# Supplementary material
Source: PubMed Central journal article supplement (PMC8647039)
Supplement: NIHMS1750760-supplement-3.pdf [file NIHMS1750760-supplement-3.pdf]

| Primers used in this study |                                         |
|----------------------------|-----------------------------------------|
| Name                       | Sequence (5' to 3')                     |
| <i>AsPGRP-Lc</i>           | Forward: 5'-AGTCGTGGTCCTGGCGGCTCT-3'    |
|                            | Reverse: 5'-ACGAGCGATGCAATGCGCGGCA-3'   |
| <i>AsDegensin</i>          | Forward: 5'-ACCGTACAGGCTGTAGTTGGA-3'    |
|                            | Reverse: 5'-ACTCGAGGAACTTTCCGACAT-3'    |
| <i>AsCecropin</i>          | Forward: 5'-GCGCCCCGTTGGAAGT-3'         |
|                            | Reverse: 5'-TCAGGTCCGCTCCATTTATCC-3'    |
| <i>AsGambicin</i>          | Forward: 5'-GTGCTGCTCTGTACGGCAGCCG-3'   |
|                            | Reverse: 5'-CTTGCACTCCTCACAGCTATTGAT-3' |
| <i>AsSTEP1</i>             | Forward: 5'-TCAGATGCGCTATCGCCAGTC-3'    |
|                            | Reverse: 5'-GCTCAGATAGGCCATTGCATT-3'    |
| <i>AsAPL1</i>              | Forward: 5'-CGTATCGAGGACGAAACGTTCC-3'   |
|                            | Reverse: 5'-TGATACGTACAGTCGCTCCAGA-3'   |
| <i>AsNOS</i>               | Forward: 5'-ACGCCATTCTCTCCAGGCTATTGT-3' |
|                            | Reverse: 5'-ATTCGTTTATTCATGGCGCCGAGC-3' |
| <i>AsRS17</i>              | Forward: 5'-GGCCAATTCTCGACAATAC-3'      |
|                            | Reverse: 5'-GACGATAAGAAGGCCTCTAAG-3'    |

**Table S1.** Primer pairs used throughout this study.
