# Supplementary material
Source: PubMed Central journal article supplement (PMC8647039)

**A**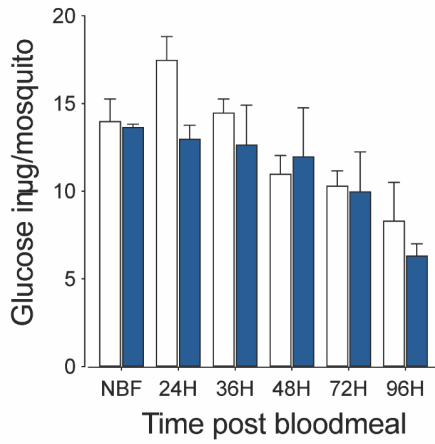**B**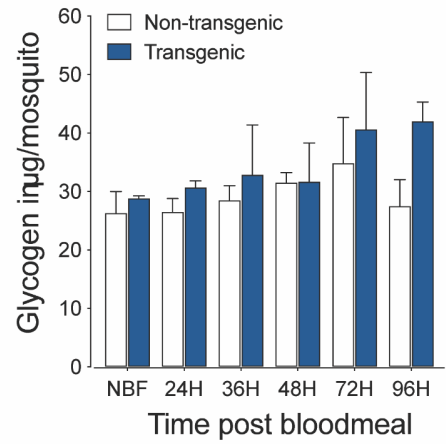**C**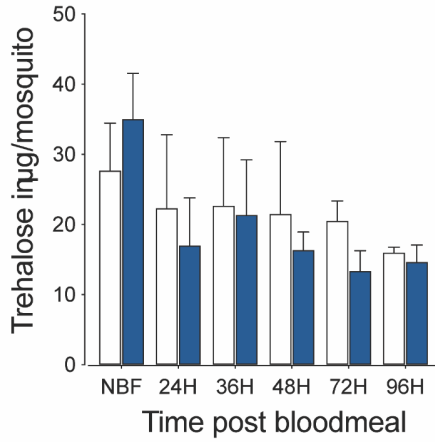**D**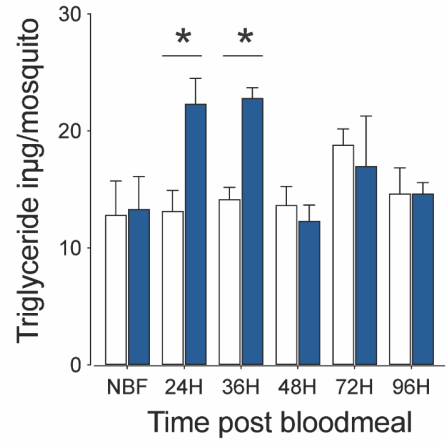**E**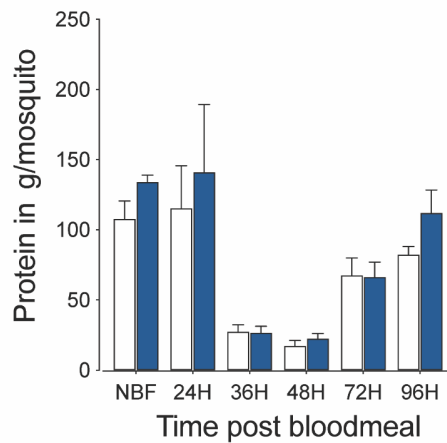**Figure 1S**

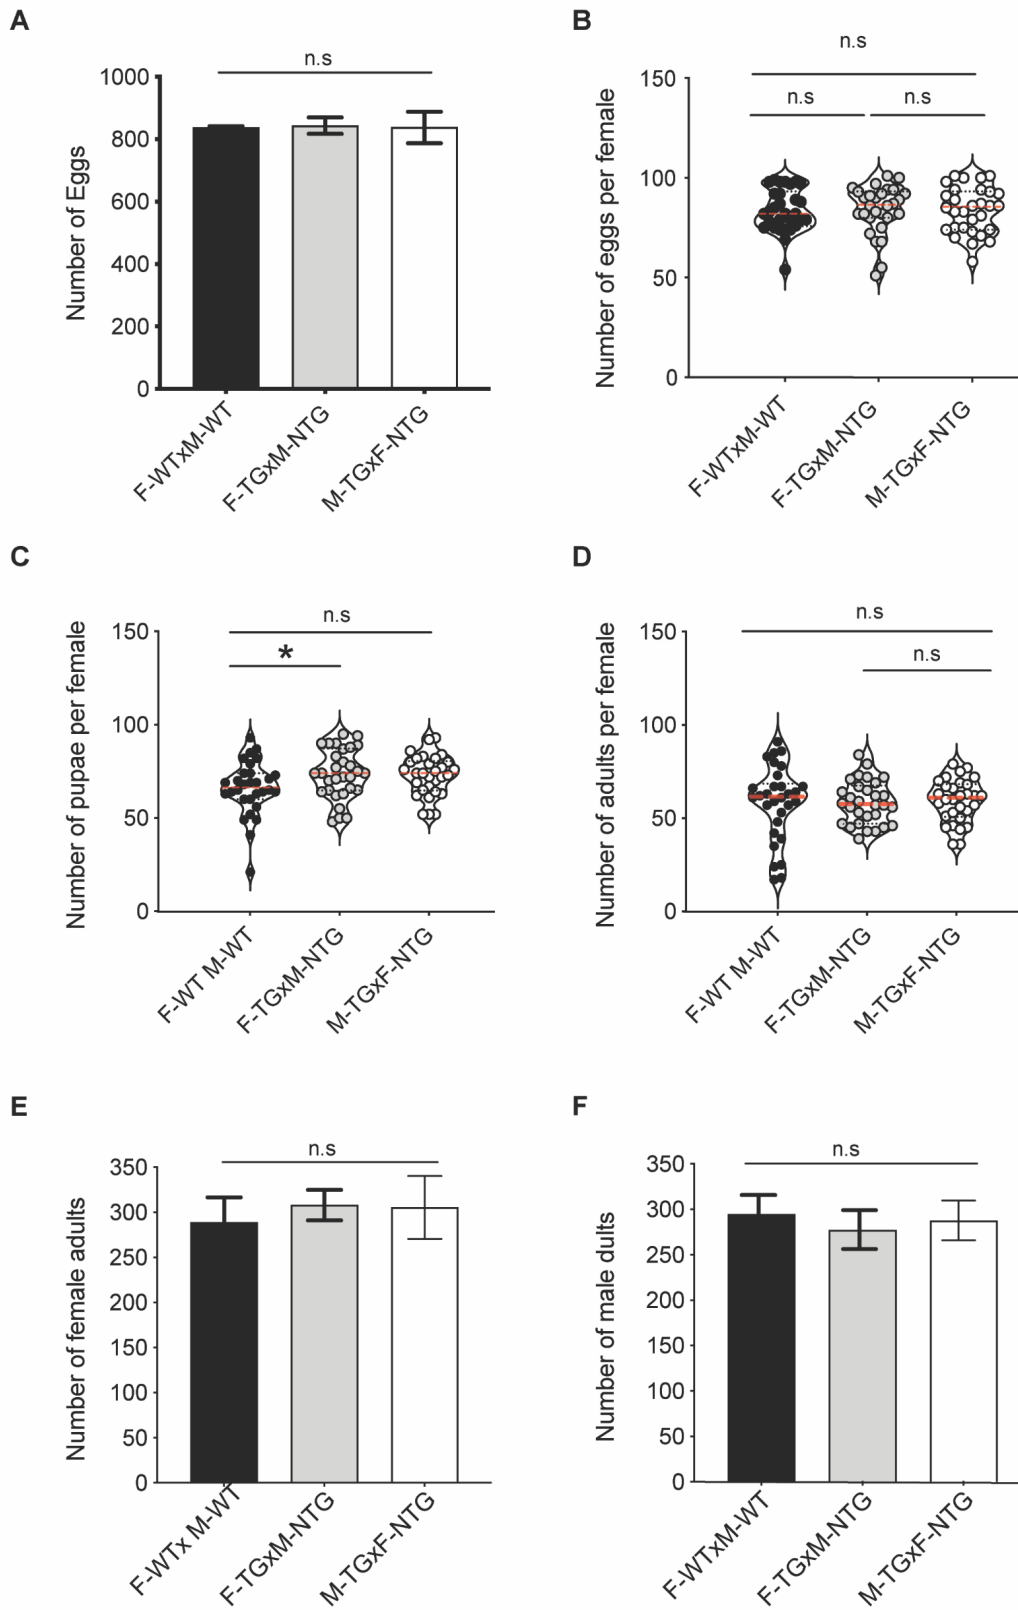

**Figure 2S**

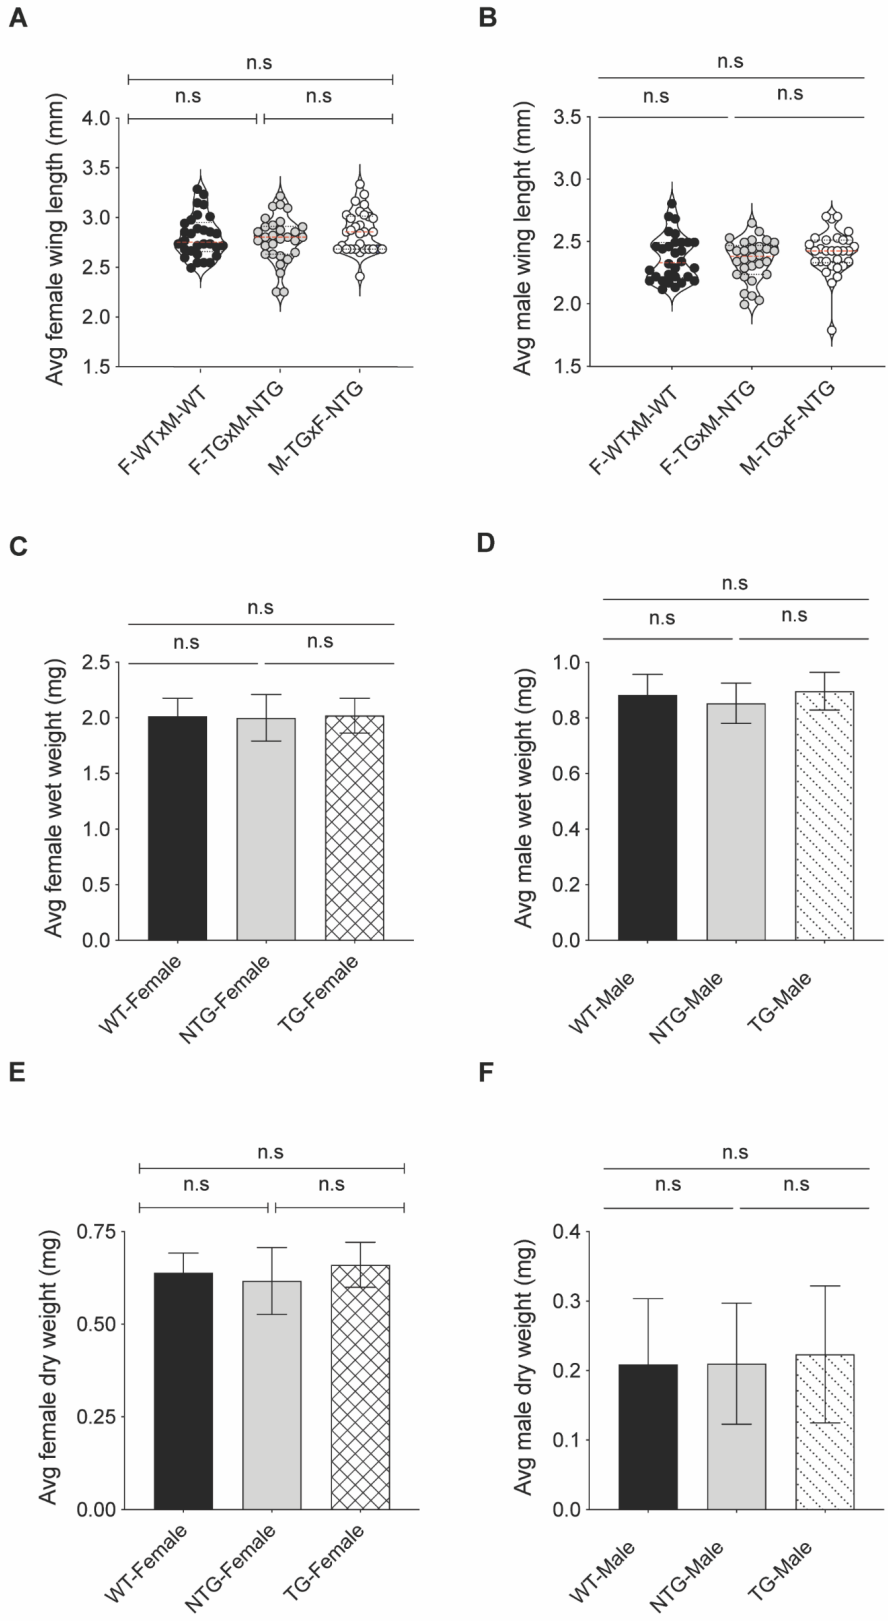

**Figure 3S**

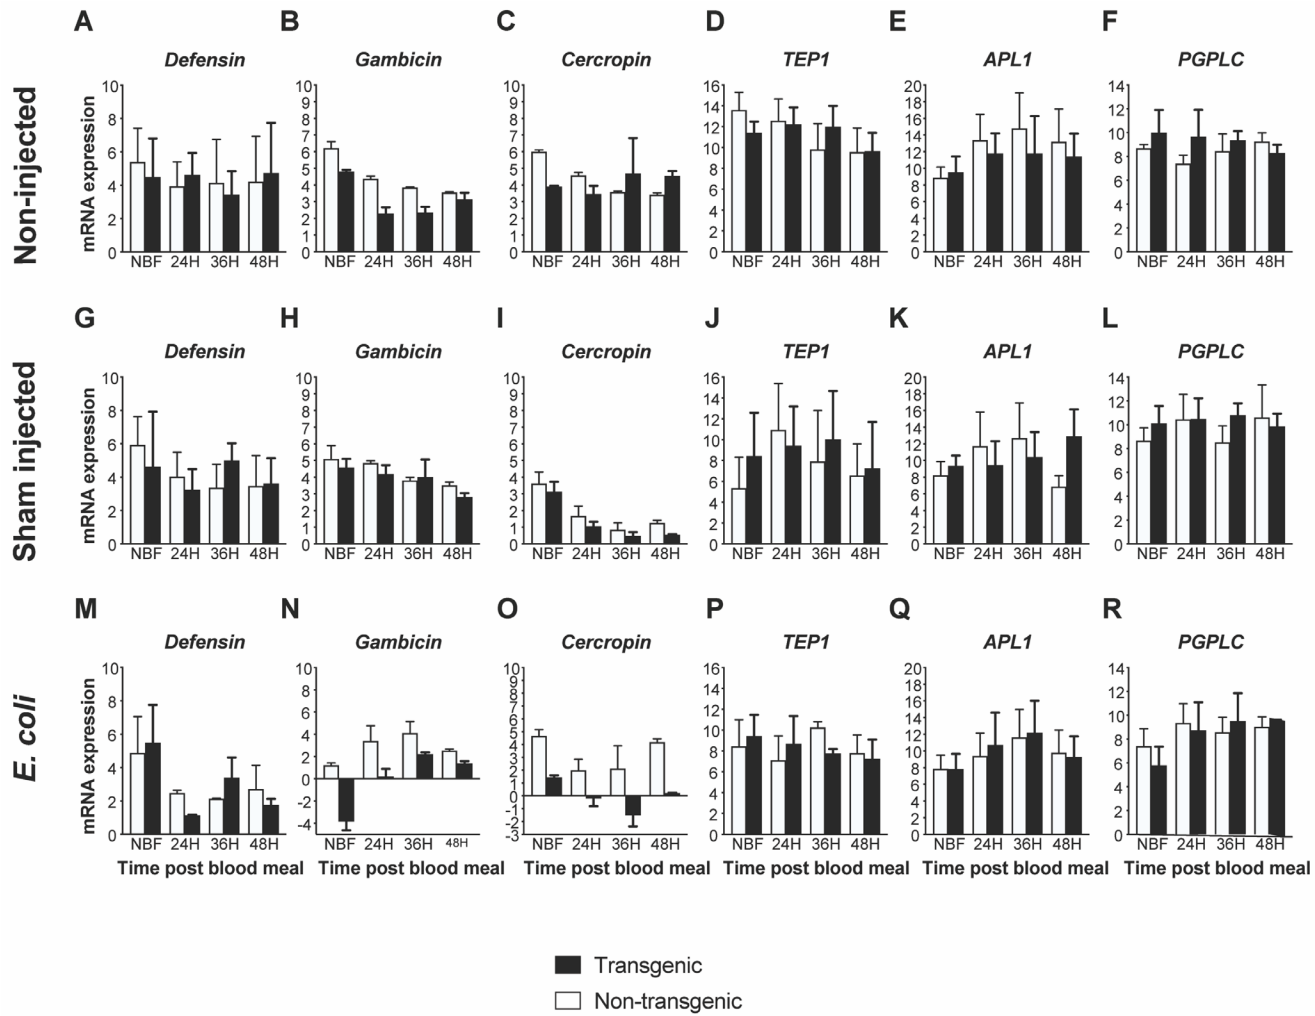

**Figure 4S**

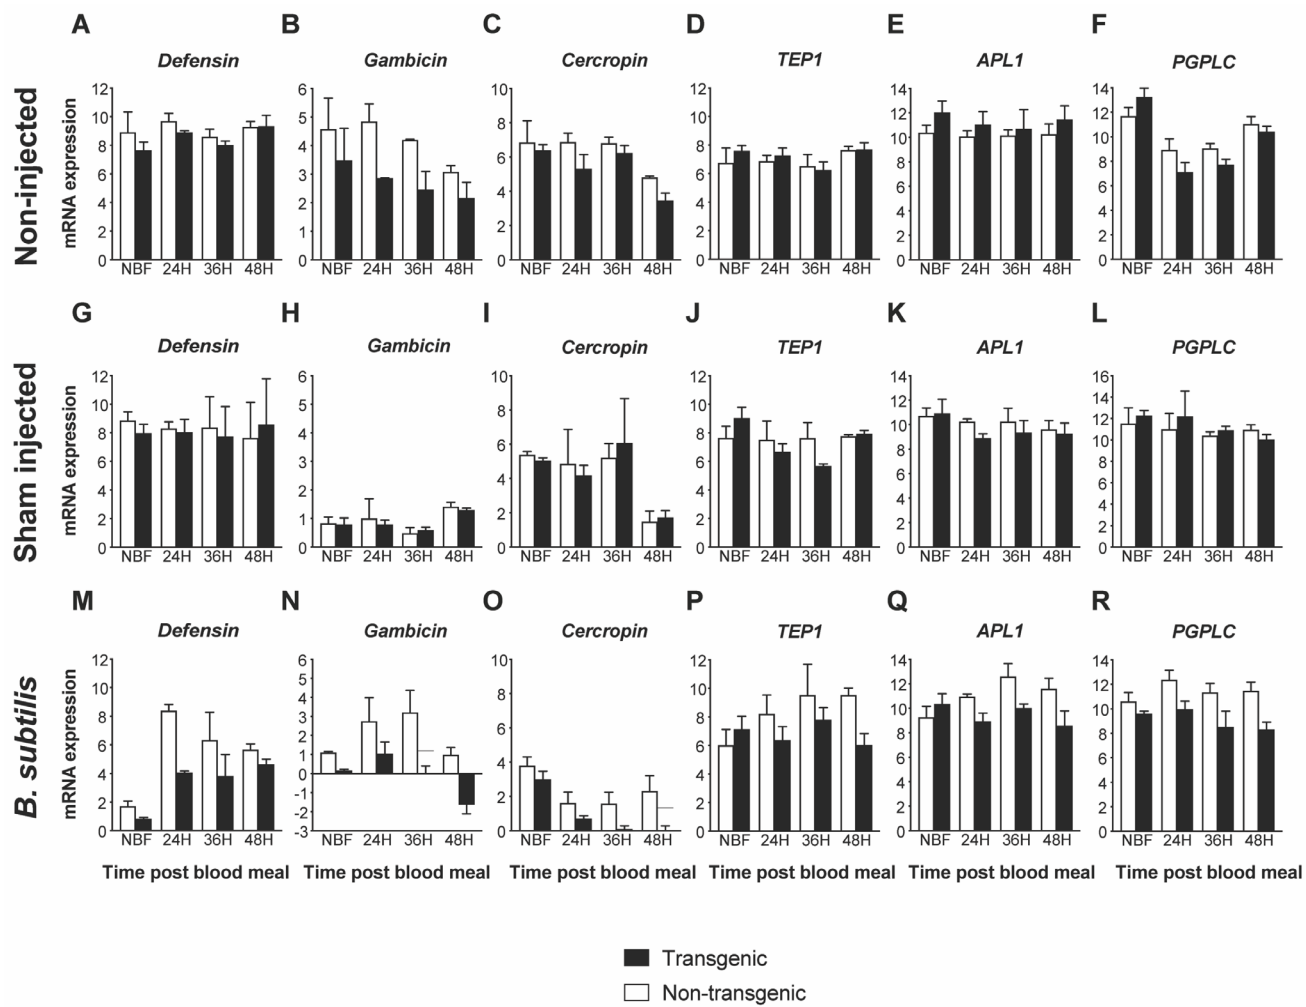

**Figure 5S**

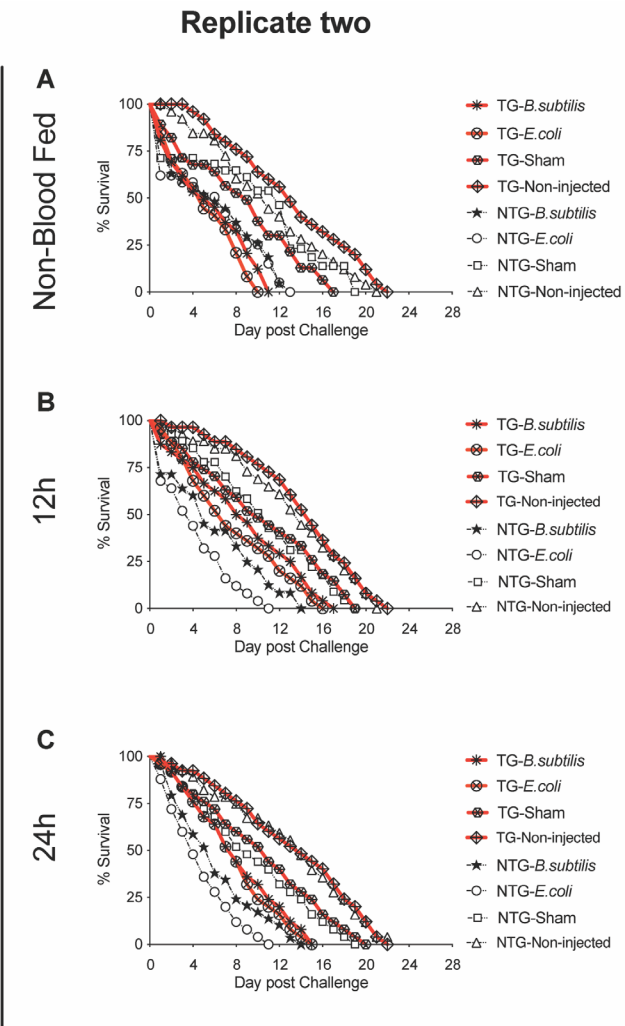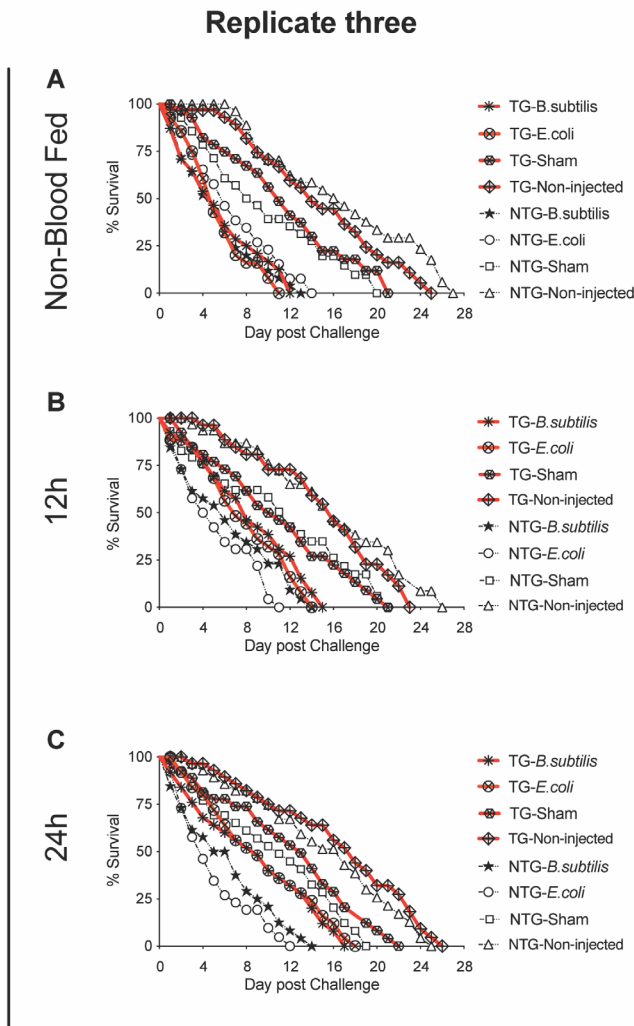

**Figure 6S**

Supplement: NIHMS1750760-supplement-1.pdf [file NIHMS1750760-supplement-1.pdf]
